# Supplementary material
Source: publisher site journal article supplement (https://www.dovepress.com/article/449135)
Supplement: Supplementary file 1 [file get_supplementary_file.php]

| **SVM-radial** | | | | | |
| --- | --- | --- | --- | --- | --- |
| **Features** | **Accuracy** | **Sensitivity** | **Specificity** | **Precision** | **AUROC** |
| **top5** | 58.35(0.06) | 68.41(0.06) | 48.96(0.10) | 59.54(0.10) | 63.25(0.06) |
| **top25** | 61.79(0.07) | 67.83(0.06) | 56.70(0.11) | 63.15(0.13) | 69.46(0.05) |
| **top100** | 66.83(0.06) | 67.42(0.07) | 67.68(0.10) | 69.18(0.13) | 74.70(0.07) |
| **top400** | 68.39(0.10) | 69.10(0.15) | 69.85(0.11) | 69.39(0.13) | 76.28(0.08) |
| **top1600** | 69.69(0.10) | 67.88(0.13) | 73.38(0.12) | 73.21(0.16) | 79.34(0.08) |
| **All genes** | 70.51(0.09) | 70.68(0.11) | 72.28(0.11) | 73.06(0.14) | 79.01(0.07) |
| **PAM** | | | | | |
| **top5** | 60.45(0.10) | 68.26(0.09) | 51.58(0.13) | 60.96(0.13) | 66.02 (0.10) |
| **top25** | 62.85(0.09) | 63.44(0.09) | 63.35(0.12) | 65.42(0.15) | 69.65 (0.06) |
| **top100** | 64.18(0.06) | 63.82(0.07) | 65.65(0.08) | 66.65(0.12) | 69.87 (0.07) |
| **top400** | 66.05(0.08) | 66.19(0.08) | 66.98(0.09) | 68.09(0.13) | 70.61 (0.07) |
| **top1600** | 66.59(0.08) | 66.3(0.11) | 67.26(0.08) | 68.08(0.13) | 68.79 (0.08) |
| **All genes** | 64.20(0.07) | 66.75(0.10) | 62.21(0.08) | 65.46(0.12) | 68.76 (0.08) |

**Supplemetary Tables**

**Supplementary Table 1**: Performance of SVM-radial and PAM models in test data class prediction analysis

**Note**: Support vector machine (SVM)-radial and prediction analysis of microarrays (PAM) models were developed using different numbers of top differentially expressed genes (DEGs). These models were evaluated for their class prediction performance in test data and independent dataset. The above table depicts the performance of models in test data (generated from random sampling) class prediction analysis. The models were compared using RMA, followed by Tukey’s post hoc test with Greenhouse-Geisser and Huynh-Feldt corrections for each parameter separately. SVM-radial models performed better with the higher number of feature DEGs. The values in the tables are in percentage, and the standard deviation for the ten iterations is in brackets.

**Supplementary Table 2**: Demographic and blood cell type data of participants from the Pune-SCZ study

| **Characteristics** | **SCZ** | **Control** | **Pvalue** |
| --- | --- | --- | --- |
| Age (Year)* (n=20) | 33.0 (9.754) | 36.6 (6.04) | 0.4988 |
| Sex (M/F) # (n=20) | 4/6 | 4/6 | 1.00 |
| Neutrophil (103/μL)* | 4.8 (2.04) | 3.9 (1.26) | 0.2810 |
| Lymphocyte (103/μL)* | 2.3 (0.68) | 2.2 (0.43) | 0.8623 |
| Monocyte (103/μL)* | 0.5 (0.13) | 0.6 (0.11) | 0.3617 |
| Eosinophil (103/μL)$ | 0.2 (0-0.3) | 0.2 (0.1-0.7) | 0.2369 |
| Basophil (103/μL)$ | 0.025 (0-0.1) | 0.040 (0-0.1) | 0.9650 |

**Note**: SCZ: Schizophrenia, CNT: Control,* Unpaired t-test (s.d.), # Chi-squared test, $ Mann-Whitney U test (min-max). (Note: Since cell counts for two samples were not available, the comparison of blood cell counts between SCZ and CNT was performed on 18 samples)

**Supplementary Table 3:** Alignment percentage and diagnosis of RNA-Sequencing samples from the Pune-SCZ study

| **Sample ID** | **Alignment (%)** | **Diagnosis** |
| --- | --- | --- |
| 1001 | 84.75 | SCZ |
| 1002 | 95.31 | SCZ |
| 1003 | 85.85 | SCZ |
| 1005 | 95.53 | SCZ |
| 1006 | 83.61 | SCZ |
| 1007 | 80.16 | SCZ |
| 1008 | 94.10 | SCZ |
| 1009 | 79.92 | SCZ |
| 1010 | 88.43 | SCZ |
| 1011 | 80.18 | CNT |
| 1012 | 81.65 | CNT |
| 1013 | 85.97 | CNT |
| 1014 | 82.79 | CNT |
| 1016 | 84.63 | CNT |
| 1017 | 93.83 | CNT |
| 1018 | 95.11 | CNT |
| 1019 | 93.75 | CNT |
| 1020 | 81.67 | SCZ |
| 1021 | 94.80 | CNT |
| 1022 | 95.11 | CNT |

**Note**: Sequences were aligned to the human genome (GENECODE hg38) using HISAT2.

**Supplemetary Figures**

**Supplementary Figure 1:** Boxplots for train and test data after quantile normalization. The pre-processing of raw meta-file for prediction analysis using ML models included quantile normalization of train and test datasets. A) The samples from each study in the train data were quantile normalized independently. B) The quantile targets from these studies were used for normalization of test samples from respective studies. The normalization was performed for each iteration of train and test datasets. The boxplots for iteration one were used as a representative images for visualization of quantile normalization. (**Note**: The boxplot displays data from the studies: GSE18312 1, GSE38481 2, GSE38484 2, GSE48072 3, GSE54913 4, and Kumarasinghe et al. 5)

**Supplementary Figure 2:** Boxplots for train data and the independent dataset (GSE27383) after quantile normalization. The quantile targets from each iteration of training data were used to normalize samples from GSE27383. The boxplot for iteration one was used as a representative image for visualization of quantile normalization. (**Note**: The boxplot displays data from the studies: GSE18312 1, GSE38481 2, GSE38484 2, GSE48072 3, GSE54913 4, Kumarasinghe et al. 5, and GSE27383 6)

**Supplementary Figure 3:** Principal components analysis (PCA) plots before and after batch correction. A and C) Test samples from the test and independent dataset were visualized on PCA plots with respect to the train data. B and D) Test samples were batch-corrected using train data as reference and were visualized using PCA plots. The plots from iteration one were used as representative images. (**Note**: The PCA plots display data from the studies: GSE18312 1, GSE38481 2, GSE38484 2, GSE48072 3, GSE54913 4, Kumarasinghe et al. 5, and GSE27383 6)

**Supplementary Figure 4:** Volcano plot for normalized and batch-corrected train data. The feature selection from pre-processed train data was performed using DGEA. The differentially expressed genes (adj.P.val < 0.05) were used as feature genes for development of ML models. The volcano plot for iteration one was used as a representative image for visualization of DGEA.

**Supplementary Figure 5:** Comparison of performance of ML models in the classification of test and the independent dataset samples. ML models with different numbers of features were compared using two-way ANOVA followed by Tukey’s post hoc test. A) No significant difference was observed in the performance of the SVM-radial models in the classification of the test data and the independent dataset samples. B) Similarly, no significant difference was observed in the performance of PAM models in the classification of the test data and the independent dataset samples. Suggesting the robust nature of the models. (**Note**: Error bars represent standard deviation for ten iterationss, “ ns ” adjusted P value > 0.05 )

**Supplementary Figure 6**: A representative FastQC report of an RNA-Seq sample from the Pune-SCZ study. A and B) Suggest that the quality of sequencing was acceptable. C) and D) Suggest no significant library contamination or PCR duplication.

**Supplementary Figure 7:** Sensitivity and specificity of ensemble learning in class prediction analysis of RNA-Seq samples from Pune-SCZ study with DEGs as features. ML models were compared using RMA followed by Tukey’s post hoc test with Greenhouse-Geisser and Huynh-Feldt corrections. A) Ensemble learning with the top four hundred DEGs resulted in higher precision with a drop in sensitivity when compared to individual ML models. B) Ensemble learning also resulted in higher specificity compared to individual ML models. (**Note**: Error bars represent standard deviation for ten iterations, "**" (adjusted P value ≤ 0.01), "****" (adjusted P value ≤ 0.0001))

**Supplementary Figure 8:** Functional enrichment and networking analyses of DEGs. The 400 DEGs from the iteration with the highest precision in ensemble learning were chosen for the analysis. A) The top ten biological processes (adj.P.val <0.05) were visualized using a bar-plot. B) A STRING-based protein-protein network was established for common genes using Cytoscape. The MCC method of the cytohubba plugin identified the top 5 hub genes. The network of 5 hub genes and their first-degree nodes was visualized. The intensity of node colour represents the MCC rank. i.e., *RBX1* ranked as number one followed by *CUL4B*, *DDB1*, *PRPF19*, and *COPS4* respectively.

**Supplementary Figure 9:** Sensitivity and specificity of ensemble learning in the independent dataset prediction analysis with DEGs as features. SVM-radial, PAM and ensemble with 400 DEGs were ensemble together to achieve higher diagnostic precision. These models were compared using RMA followed by Tukey’s post hoc test with Greenhouse-Geisser and Huynh-Feldt corrections. A) This higher precision by ensemble learning was achieved with a drop in sensitivity and B) an increase in the specificity with respect to the individual models. (**Note**: Error bars represent standard deviation for ten iterations, "**" (adjusted P value ≤ 0.01), "****" (adjusted P value ≤ 0.0001))

**Supplementary Figure 10:** Test data prediction accuracy and precision of SVM-radial, PAM and ensemble learning for each microarray dataset. The ensemble learning with the top 400 DEGs was evaluated for its performance across each dataset. A) No specific trend was observed for ML models in class prediction of the datasets, irrespective of the tissue type, medication status and sample number. B) However, high precision in most of the datasets indicates a better performance ensemble learning over SVM-radial and PAM.

**Supplemetary References**

1. Bousman CA, Chana G, Glatt SJ, et al. Preliminary evidence of ubiquitin proteasome system dysregulation in schizophrenia and bipolar disorder: convergent pathway analysis findings from two independent samples. *Am J Med Genet B Neuropsychiatr Genet*. 2010;153B(2):494-502. doi:10.1002/ajmg.b.31006

2. de Jong S, Boks MPM, Fuller TF, et al. A Gene Co-Expression Network in Whole Blood of Schizophrenia Patients Is Independent of Antipsychotic-Use and Enriched for Brain-Expressed Genes. Mazza M, ed. *PLoS One*. 2012;7(6):e39498. doi:10.1371/journal.pone.0039498

3. Stoll G, Pietiläinen OPH, Linder B, et al. Deletion of TOP3β, a component of FMRP-containing mRNPs, contributes to neurodevelopmental disorders. *Nat Neurosci*. 2013;16(9):1228-1237. doi:10.1038/nn.3484

4. Xu Y, Yao Shugart Y, Wang G, et al. Altered expression of mRNA profiles in blood of early-onset schizophrenia. *Sci Rep*. 2016;6(1):16767. doi:10.1038/srep16767

5. Kumarasinghe N, Beveridge NJ, Gardiner E, et al. Gene expression profiling in treatment-naive schizophrenia patients identifies abnormalities in biological pathways involving AKT1 that are corrected by antipsychotic medication. *Int J Neuropsychopharmacol*. 2013;16(07):1483-1503. doi:10.1017/S1461145713000035

6. van Beveren NJM, Buitendijk GHS, Swagemakers S, et al. Marked reduction of AKT1 expression and deregulation of AKT1-associated pathways in peripheral blood mononuclear cells of schizophrenia patients. *PLoS One*. 2012;7(2). doi:10.1371/journal.pone.0032618
